# Supplementary material
Source: Research Square preprint supplement (doi:10.21203/rs.3.rs-9447894/v1)
Supplement: Supplementary file 1 [file c1aed9e6bafe230dc9c60ff1.pdf]

Equivalence Test in R Studio, Version 2026.21.02

Caldwell, A. R. (2026, 26. Januar). Equivalence testing for F-tests. TOSTER.  
[https://aaroncaldwell.us/TOSTERpkg/articles/the\\_ftestTOSTER.html](https://aaroncaldwell.us/TOSTERpkg/articles/the_ftestTOSTER.html)

### Code Irrelevant Babble effect

```
equ_ftest(Fstat = 1.30,  
          df1 = 2,  
          df2 = 138,  
          eqbound = 0.03)
```

```
> library(TOSTER)
```

```
> result <- equ_ftest(Fstat = 1.30, df1 = 2, df2 = 138, eqbound = 0.03)
```

```
> print(result)
```

### Equivalence Test from F-test

data: Summary Statistics

F = 1.3, df1 = 2, df2 = 138, p-value = 0.2224

95 percent confidence interval:

0.00000000 0.07420119

sample estimates:

[1] 0.01849218

### Code Intensity effect

```
equ_ftest(Fstat = .34,  
  df1 = 1,  
  df2 = 139,  
  eqbound = 0.03)
```

```
> library(TOSTER)  
> result <- equ_ftest(Fstat = .34, df1 = 1, df2 = 139, eqbound = 0.03)  
> print(result)
```

### Equivalence Test from F-test

data: Summary Statistics

F = 0.34, df1 = 1, df2 = 139, p-value = 0.06232

95 percent confidence interval:

0.00000000 0.04333664

sample estimates:

[1] 0.002440075
